# Supplementary material for: The relationship between low energy availability, injuries, and bone health in recreational female athletes
Source: PeerJ. 2024 Jun 21;12:e17533. doi: 10.7717/peerj.17533 (PMC11195543; doi:10.7717/peerj.17533)
Supplement: Supplemental Information 1 [file peerj-12-17533-s001.xlsx]

## Sheet: List1
Participant code	LEAF-Q score	Age (years)	BMI	MC lenght (days)	Menstruation (days)	BMD (g/cm2) total body	Z-score total body	BMD (g/cm2) L spine	BMD (g/cm2) neck	fat mass (g)	fat free mass (g)	total mass (g)	% fat	Body weight fluctuations (kg)	Training hours/week	Injuries in the past year	Age at menarche	Secondary amenorrhea. No=0, yes=1	Menstrual bleeding changes related to training. Yes=1, no=0	EO COP average velocity, mm/sec	EC COP average velocity, mm/sec
MC001	10	21	24.17	40	7	1.181	1.1	1.235	1.071	20313	46360	66673	30.5	12	8	no	15 or older	0	1	7.184	12.469
MC002	8	22	26.18	29	5	1.196	1.2	1.198	1.041	19795	55569	75363	26.3	25.5	5	no	11 or younger	1	1	4.429	7.989
MC003	8	24	22.05	29	4	1.094	-0.1	0.996	0.953	23709	44105	67813	35	15	7	yes, 5+	12 to 14	0	1	8.289	16.2
MC004	10	27	18.04	30	5	1.133	0.3	1.048	0.892	15598	39781	55379	28.2	16	7	yes, 5+	12 to 14	1	0	8.959	13.606
MC005	11	22	24.61	29	4	1.13	0.4	1.091	1	22979	46534	69514	33.1	16	5	yes, 5+	12 to 14	1	1	7.633	14.775
MC006	10	31	20.76	28	3.5	1.037	-1	0.887	0.852	15485	44792	60277	25.7	7	10	yes, 5+	11 or younger	0	1	10.47	23.68
MC007	10	22	21.3	29	7	1.178	1	1.222	1.08	17069	47660	64729	26.4	6	9	yes, 5+	15 or older	0	1	8.795	15.875
MC008	11	23	22.31	28	5	1.167	0.8	1.049	1.042	16949	51476	68425	24.8	16	8	yes, 3-4	12 to 14	1	1	10.316	16.561
MC009	12	24	22.22	27	5	1.212	1.3	1.259	1.027	16705	44895	61600	27.1	16	9	yes, 5+	11 or younger	0	0	10.166	22.823
MC010	9	23	23.88	35	6	1.153	0.7	1.085	1.093	17879	48952	66831	26.8	13	12	yes, 1-2	12 to 14	1	1	6.404	17.315
MC011	9	24	22.68	28	7	1.103	0	1.132	0.983	20967	41511	62478	33.6	8	6	yes, 3-4	12 to 14	0	1	7.556	18.568
MC012	13	20	21.22	24	5	1.044	-0.7	1.051	0.767	15165	40590	55755	27.2	10	10	no	12 to 14	1	1	10.786	16.606
MC013	1	29	30.37	31	5	1.115	0	1.037	0.992	38146	57968	96115	39.7	14	4	no	12 to 14	0	0	9.043	16.372
MC014	2	22	18.56	31	3	1.085	-0.2	1.122	0.821	15088	38647	53735	28.1	10	3	no	12 to 14	1	0	10.508	17.318
MC015	2	23	23.12	28	6	1.108	0.1	1.081	0.891	21238	36245	57484	36.9	6	1.5	no	12 to 14	0	0	5.736	9.87
MC016	2	23	27.39	26	4	1.026	-1	0.968	0.766	22464	51699	74164	30.3	18.3	7	no	12 to 14	1	0	9.903	16.147
MC017	1	21	21.91	28	4.5	1.107	0.1	1.037	0.904	15527	41268	56796	27.3	6	10	no	15 or older	0	0	7.839	23.556
MC018	1	23	22.06	28	4	1.123	0.3	1.123	0.885	15277	38057	53335	28.6	10	5	no	12 to 14	0	0	20.387	21.826
MC019	2	28	22.04	31	7	1.092	-0.2	1.028	0.884	17074	43288	60361	28.3	7.5	2	no	15 or older	1	0	9.463	19.128
MC020	2	29	18.52	26	8	1.182	0.8	1.098	0.829	17123	45162	62285	27.5	8	0	no	12 to 14	0	0	13.819	31.391
MC021	1	20	21.31	28	6	1.224	1.6	1.122	1.131	15915	50532	66448	24	7	7	no	12 to 14	0	0	11.254	27.325
MC022	3	25	28.96	28	3	1.186	1	1.089	1.019	28943	45177	74119	39	31	4	no	11 or younger	0	1	10.616	11.276
MC023	1	22	20.58	26	5	1.052	-0.6	0.977	0.777	15859	38785	54644	29	7	7	no	11 or younger	0	0	6.043	16.98
MC024	0	21	19.96	26	6	1.061	-0.5	1.036	0.747	18194	37518	55712	32.7	14	3	no	11 or younger	0	0	28.606	45.541
